# Supplementary material
Source: PubMed Central journal article supplement (PMC5750061)
Supplement: NIHMS927931-supplement-Supplemental_Information.pdf [file NIHMS927931-supplement-Supplemental_Information.pdf]

## Supplementary Information

### **Group A Streptococcal M Protein Activates the NLRP3 Inflammasome**

J. Andrés Valderrama<sup>1,2</sup>, Angelica M. Riestra<sup>1</sup>, Nina J. Gao<sup>1</sup>, Christopher N. LaRock<sup>1</sup>,  
Naveen Gupta<sup>3</sup>, Syed Raza Ali<sup>1</sup>, Hal M. Hoffman<sup>1,3</sup>, Partho Ghosh<sup>2\*</sup> and Victor Nizet<sup>1,4\*</sup>

<sup>1</sup>Department of Pediatrics, University of California, San Diego, La Jolla, CA 92093, USA.

<sup>2</sup>Department of Chemistry and Biochemistry, University of California, San Diego, La

Jolla, CA 92093, USA. <sup>3</sup>Department of Medicine, University of California, San Diego,

La Jolla, CA 92093, USA. <sup>4</sup>Skaggs School of Pharmacy and Pharmaceutical Sciences,

University of California, San Diego, La Jolla, CA 92093, USA.

Contents: Supplementary Figures 1-10 and corresponding legends.

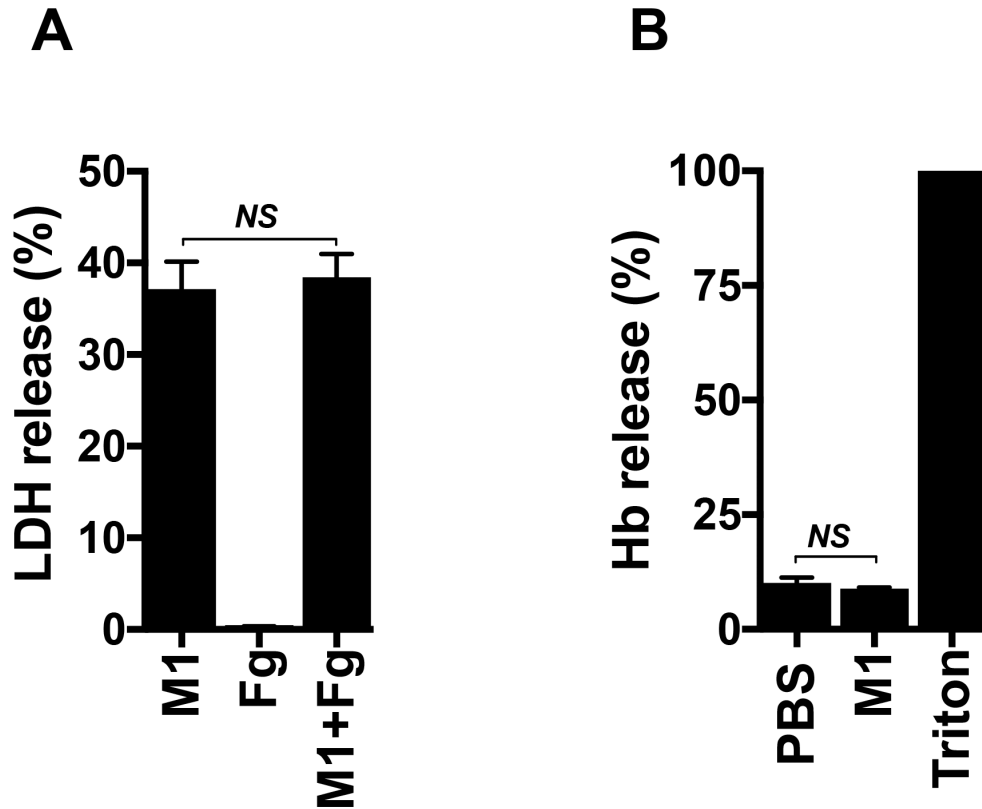

**Supplementary Figure 1. M1-induced cell death is fibrinogen-independent in macrophages and does not occur in red blood cells.** **a**, Percentage of LDH released from THP1-M $\phi$  after 2 h treatment in the presence of M1 (2  $\mu$ M), human fibrinogen (Fg, 1 mg ml<sup>-1</sup>) or M1+Fg (M1, 2  $\mu$ M + Fg, 1 mg ml<sup>-1</sup>). **b**, Percentage of hemoglobin released (Hb % release) from human erythrocytes after 2 h treatment in the presence of M1 (2  $\mu$ M). PBS and triton 0.1 % were used as the minimal or maximal inducers of Hb release, respectively. Data are plotted as the mean  $\pm$  SEM and represent two independent experiments performed in duplicate and analyzed by Student's *t*-test. *NS* = not significant ( $P > 0.05$ ).

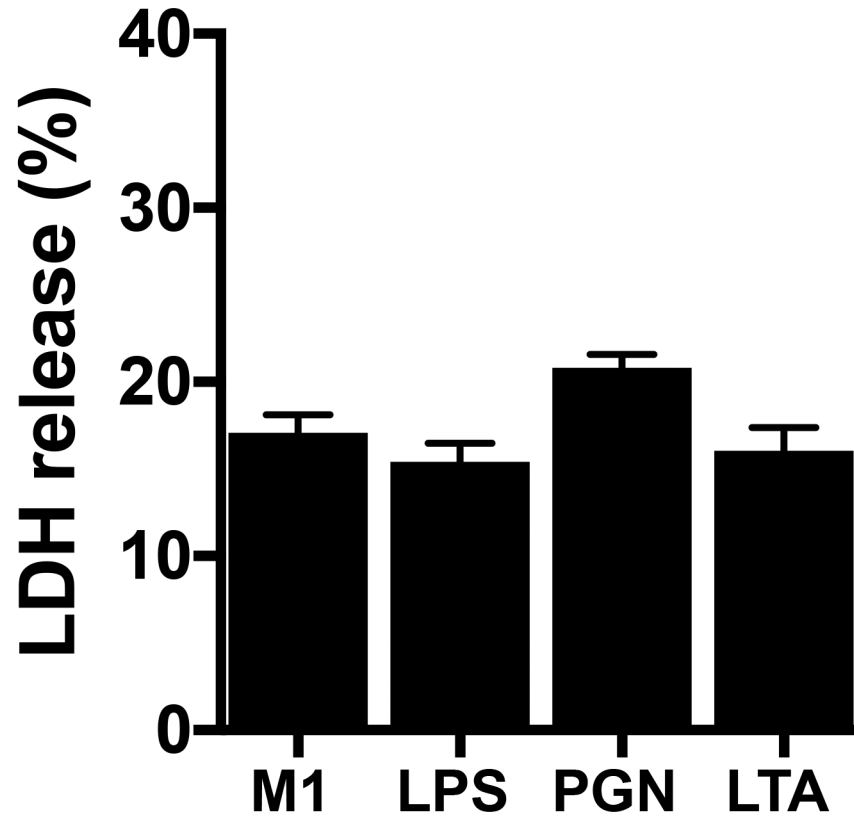

**Supplementary Figure 2. Macrophage viability upon treatment with M1 or various TLR agonists.** Percentage of LDH released from THP1-Mφ after 15 h stimulation with M1 (0.02  $\mu\text{M}$ ), lipopolysaccharide (LPS, 100  $\text{ng ml}^{-1}$ ), peptidoglycan (PGN, 1  $\mu\text{g ml}^{-1}$ ), or lipoteichoic acid (LTA, 1  $\mu\text{g ml}^{-1}$ ). Data are plotted as the mean  $\pm$  SEM and represent three independent experiments performed in triplicate.

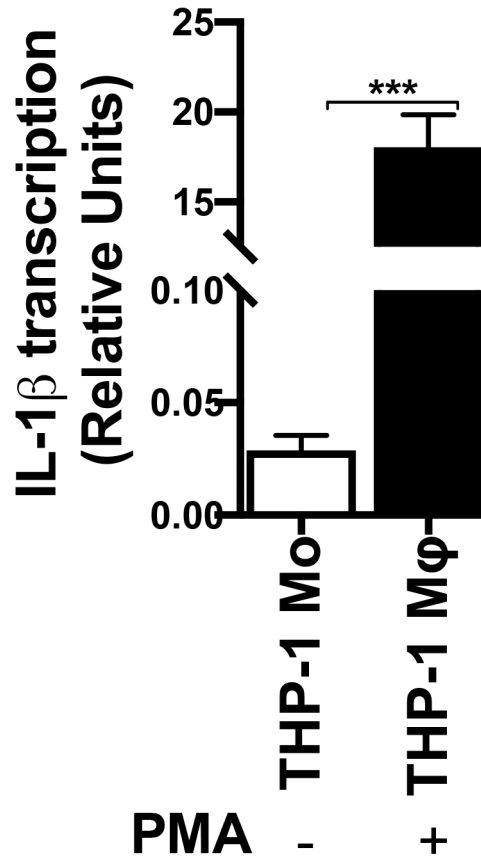

**Supplementary Figure 3. PMA triggers signal 1 in THP-1 differentiated macrophages.** qPCR analysis of IL-1 $\beta$  gene expression from undifferentiated THP-1 cells (THP1 Mo, - PMA) or THP-1 differentiated to macrophages (THP1-M $\phi$ , + PMA). The qPCR results were calculated by Delta-Delta CT method with the *gadph* gene as internal control (housekeeping gene). Data are plotted as the mean  $\pm$  SEM and represent three independent experiments performed in triplicate and analyzed by Student's *t*-test. *NS* = not significant ( $P > 0.05$ ), \*\*\* $P < 0.001$ ).

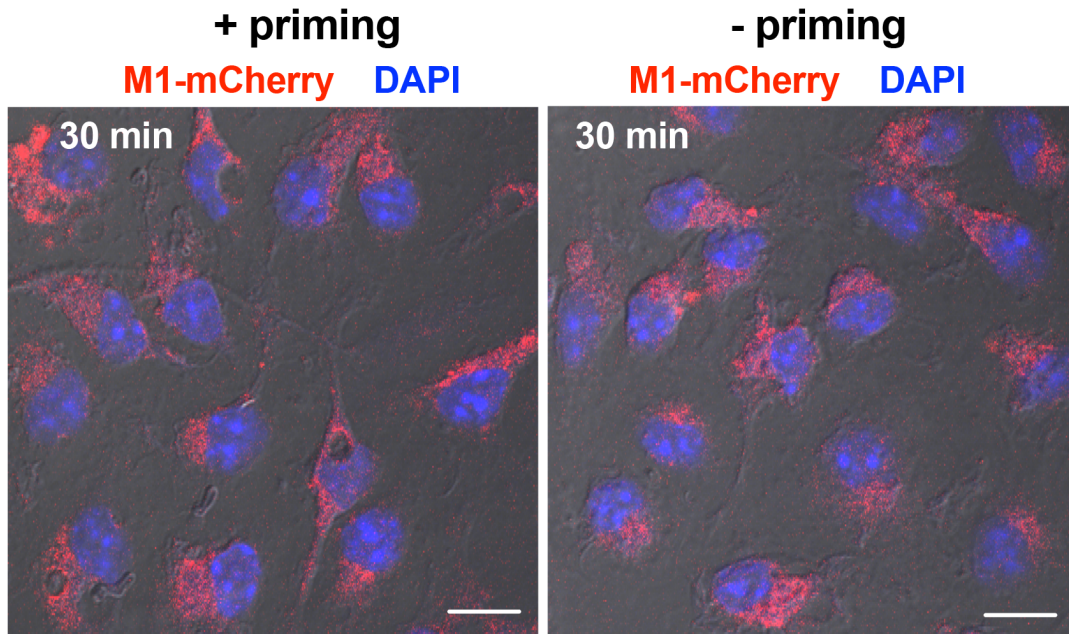

**Supplementary Figure 4. M1 uptake occurs independently of inflammasome signal one.** Confocal microscopy images of BMDMs primed (left) or unprimed (right) cells with LPS ( $10 \text{ ng ml}^{-1}$ ) for 4 h and then incubated with  $2 \text{ }\mu\text{M}$  of M1-mCherry for 30 minutes. DAPI (blue) and M1-mCherry (red) merge of fluorescence and phase contrast images are shown; scale bar =  $10\text{ }\mu\text{m}$ . Images are representative of two independent experiments.

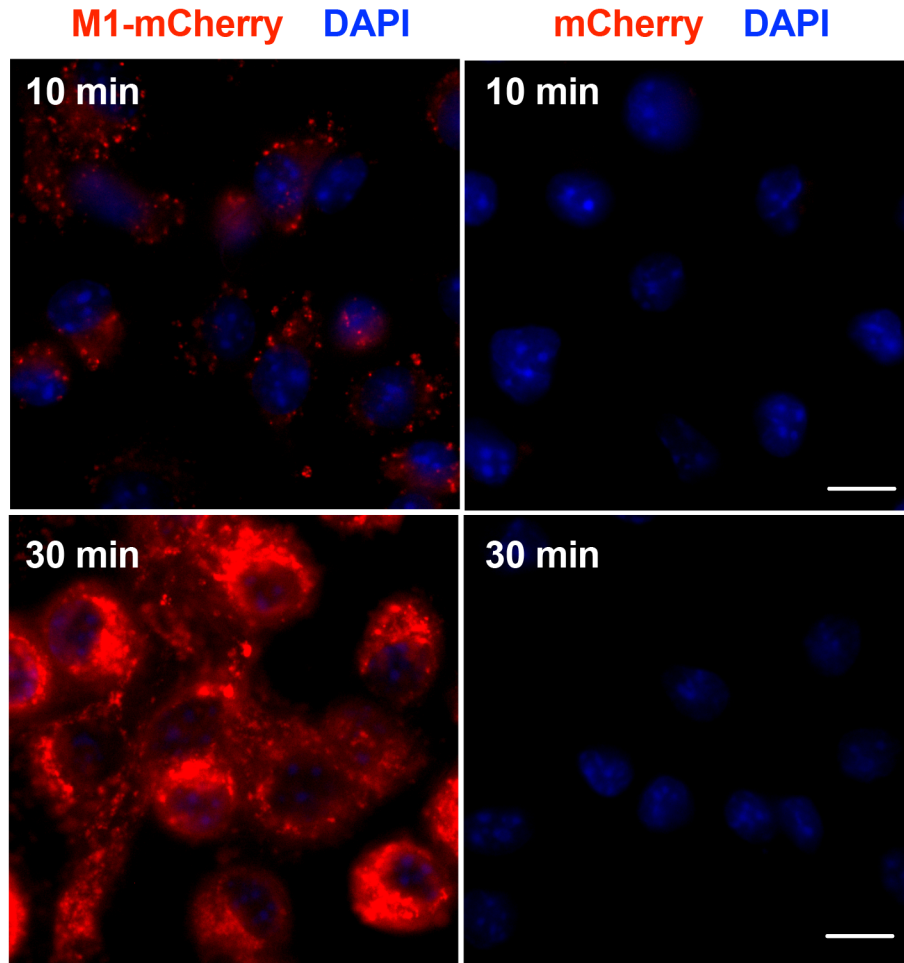

**Supplementary Figure 5. mCherry is not taken up by macrophages.** Fluorescence microscopy of BMDMs incubated with 2  $\mu$ M of M1-mCherry (left) or 2  $\mu$ M of mCherry (right) for 10 (top) or 30 min (bottom). DAPI (blue) and M1-mCherry (red) merged images are shown; scale bar = 30 $\mu$ m. Images are representative of two independent experiments.

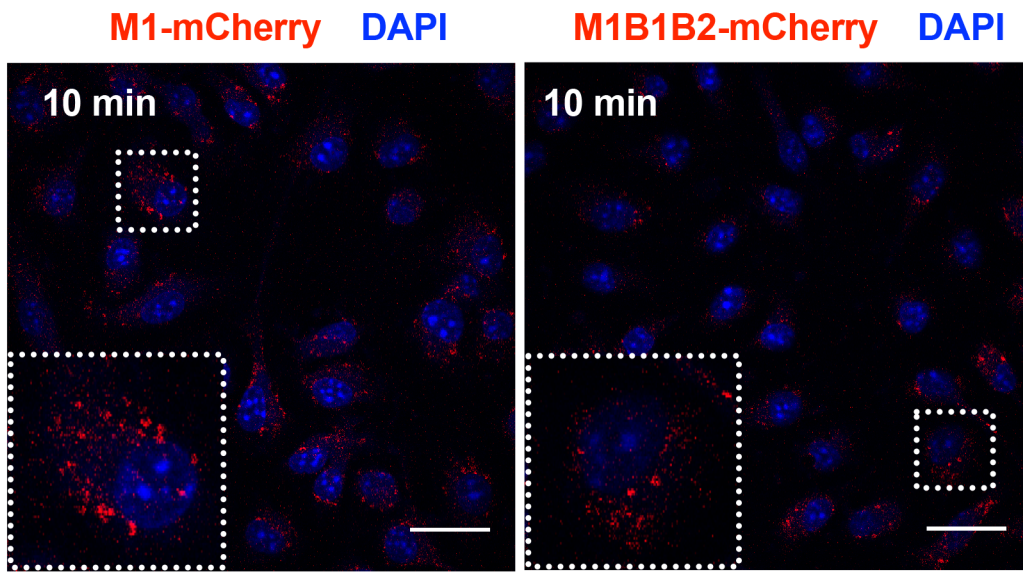

**Supplementary Figure 6. M1 B repeats are not required for M1 uptake.** Confocal microscopy images of BMDMs incubated with 2  $\mu$ M of M1-mCherry (left) or 2  $\mu$ M of M1 $\Delta$ B1 $\Delta$ B2-mCherry (right) for 10 min. DAPI (blue) and M1-mCherry (red) merged images are shown. Insets are magnifications of the dashed boxed regions in the merged images; scale bar = 30 $\mu$ m. Images are representative of two independent experiments.

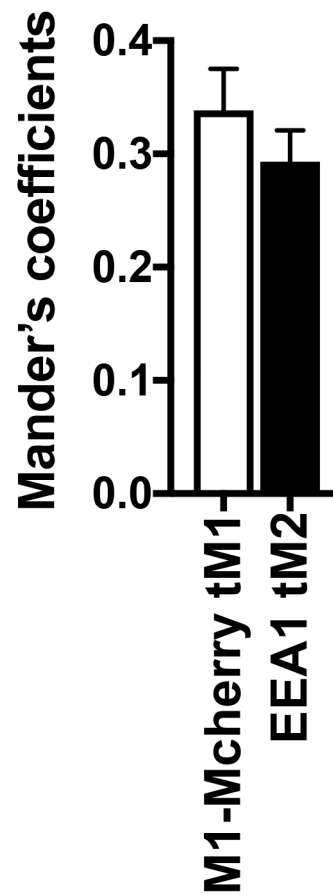

**Supplementary Figure 7. Quantification of colocalization between M1-mCherry and the early endosomal marker EEA1.** Thresholded Mander's correlation coefficients tM1 and tM2 represent the fraction of overlapped signal of each channel. Data are plotted as the mean  $\pm$  SEM and show quantification in 15 representative cells shown in **Figure 4d**



**A**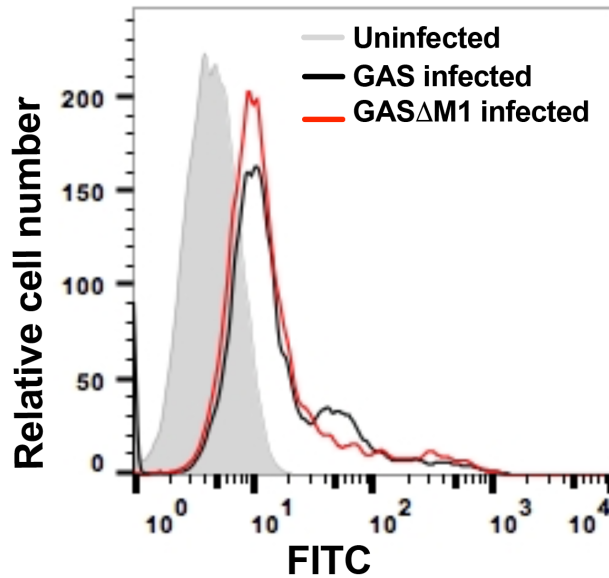**B**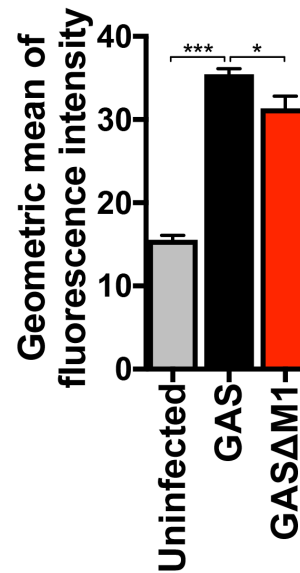

**Supplementary Figure 8. Binding of GAS to macrophages is not strongly affected by M1.** THP1-M $\phi$  infected with FITC-labeled GAS or GAS $\Delta$ M1 bacteria at MOI 10. Macrophage-bacteria interactions were examined 2 h post-infection by flow cytometry. Events were gated in the population of macrophages. Uninfected THP1-M $\phi$  served as a negative control. A representative histogram of FITC fluorescence is shown in panel **a** and panel **b** shows the geometric mean of fluorescence intensity  $\pm$  SEM and represent three independent experiments performed in triplicate and analyzed by Student's *t*-test. NS = not significant ( $P > 0.05$ ), \* $P < 0.05$ , \*\*\* $P < 0.001$ .

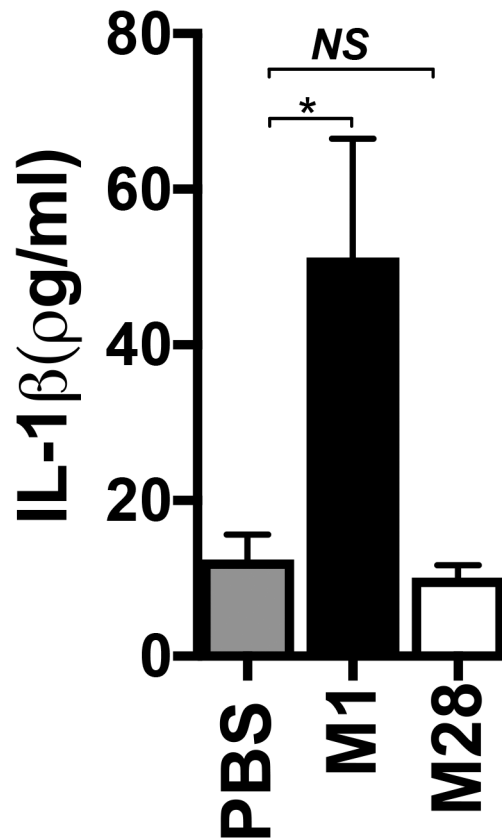

**Supplementary Figure 9. Comparison of M1 and M28 proteins induction of IL-1 $\beta$  *in vivo*.** Detection of IL-1 $\beta$  from peritoneal lavage fluid of wild type C57BL/6 mice, 4 h after injection with 150  $\mu$ g purified M1 or M28 protein. Control group animals were injected with PBS. Cytokine quantification was performed by ELISA. Data are plotted as the mean  $\pm$  SEM, N=5 and were analyzed by Student's *t*-test. *NS* = not significant ( $P > 0.05$ ) and \* $P < 0.05$ ).

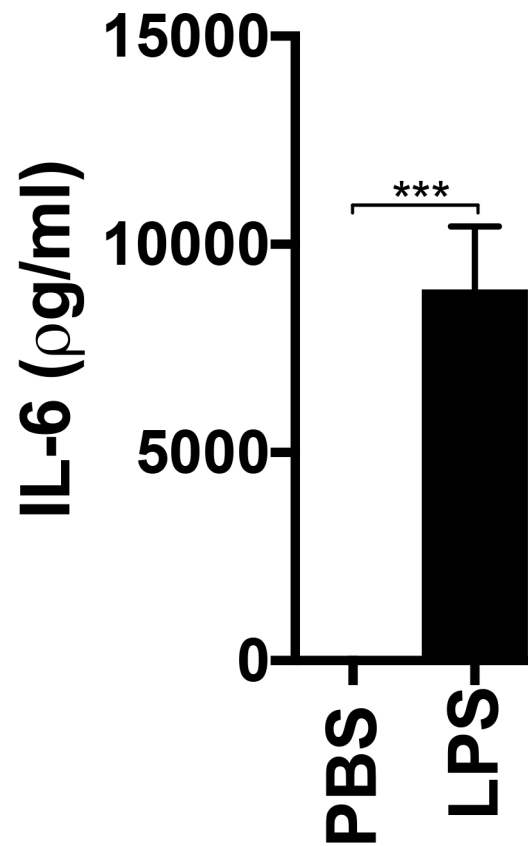

**Supplementary Figure 10. Detection of IL-6 *in vivo*.** Detection of IL-6 from peritoneal lavage fluid of wild type C57BL/6 mice, 4 h after injection with 10 mg/kg LPS. Control group animals were injected with PBS. Cytokine quantification was performed by ELISA. Data are plotted as the mean  $\pm$  SEM, N=4 and were analyzed by Student's *t*-test (\*\**P*<0.001).
